# Supplementary material for: Subgingival microbiota of dogs with healthy gingiva or early periodontal disease from different geographical locations
Source: PubMed Central journal article supplement (PMC7789547; doi:10.1186/s12917-020-02660-5), 2021-01-06
Supplement: 12917_2020_2660_MOESM4_ESM.pdf [file 12917_2020_2660_MOESM4_ESM.pdf]

USA

UK

Thailand

China

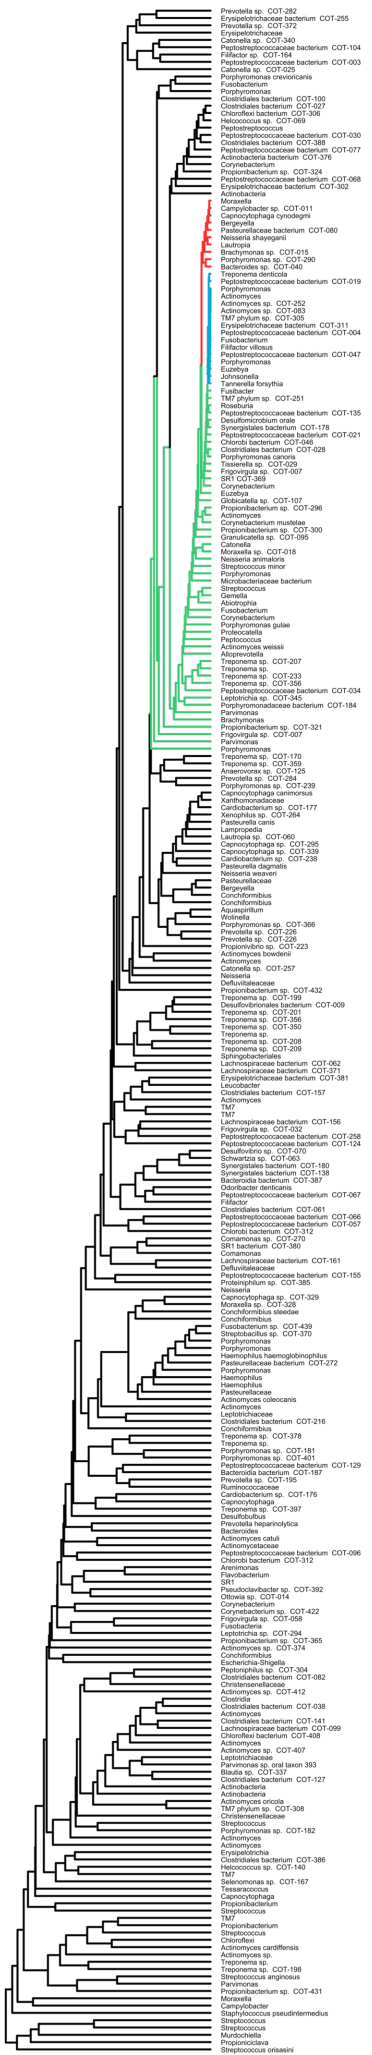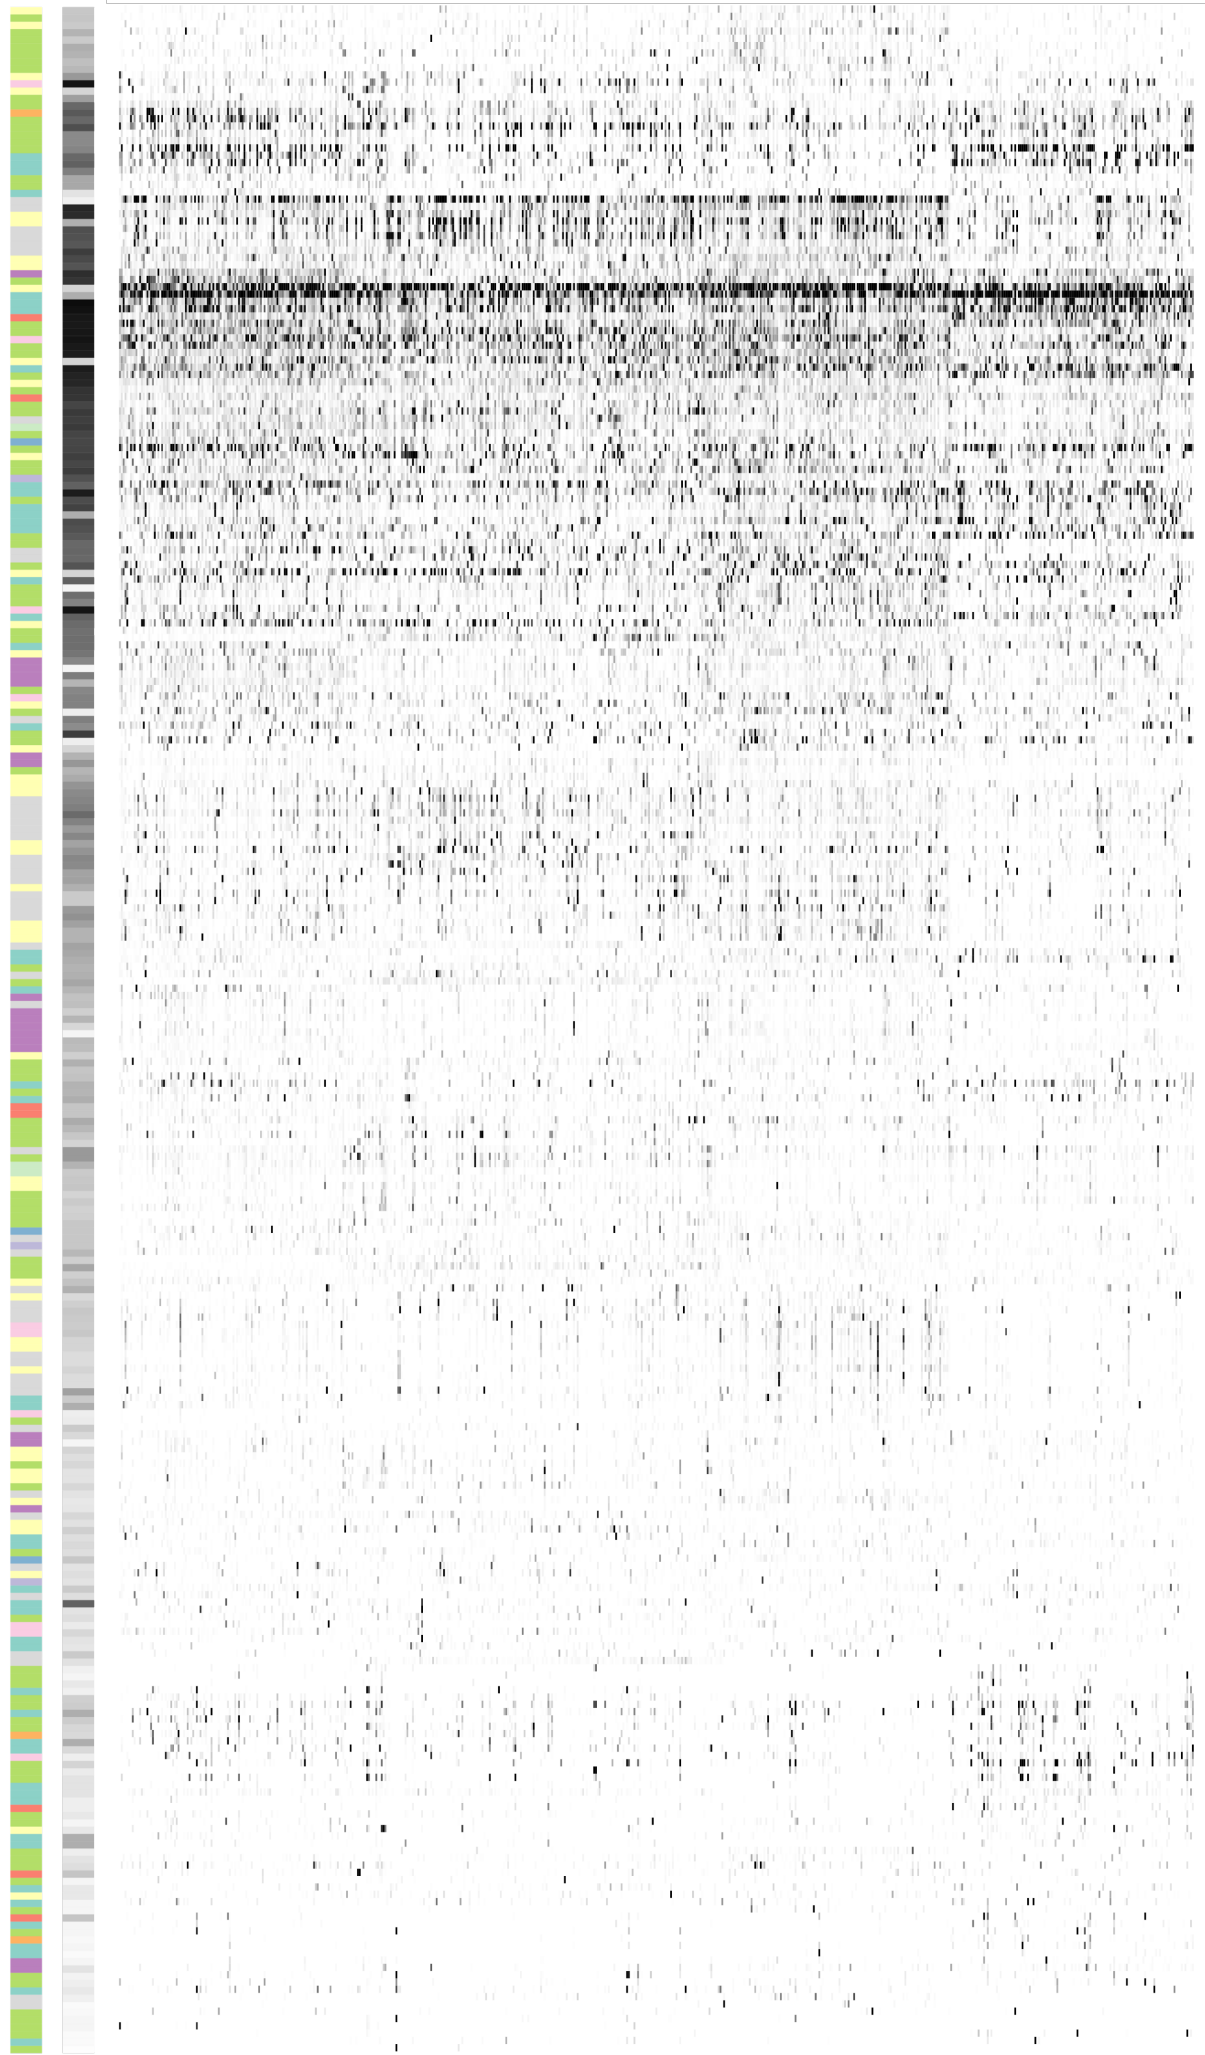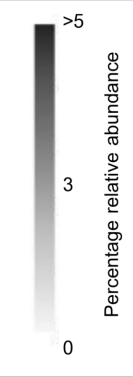

- Actinobacteria
- Bacteroidetes
- Candidate division SR1
- Candidate division TM7
- Chlorobi
- Chloroflexi
- Firmicutes
- Fusobacteria
- Proteobacteria
- Spirochaetae
- Synergistetes
